# Supplementary material for: The development of the evidence-based SDMMCC intervention to improve shared decision making in geriatric outpatients: the DICO study
Source: Springer Nature journal article supplement (doi:10.1186/s12911-020-1022-6), 2020-02-19

Supplementary S1: Flowchart inclusion Phase III Implementation

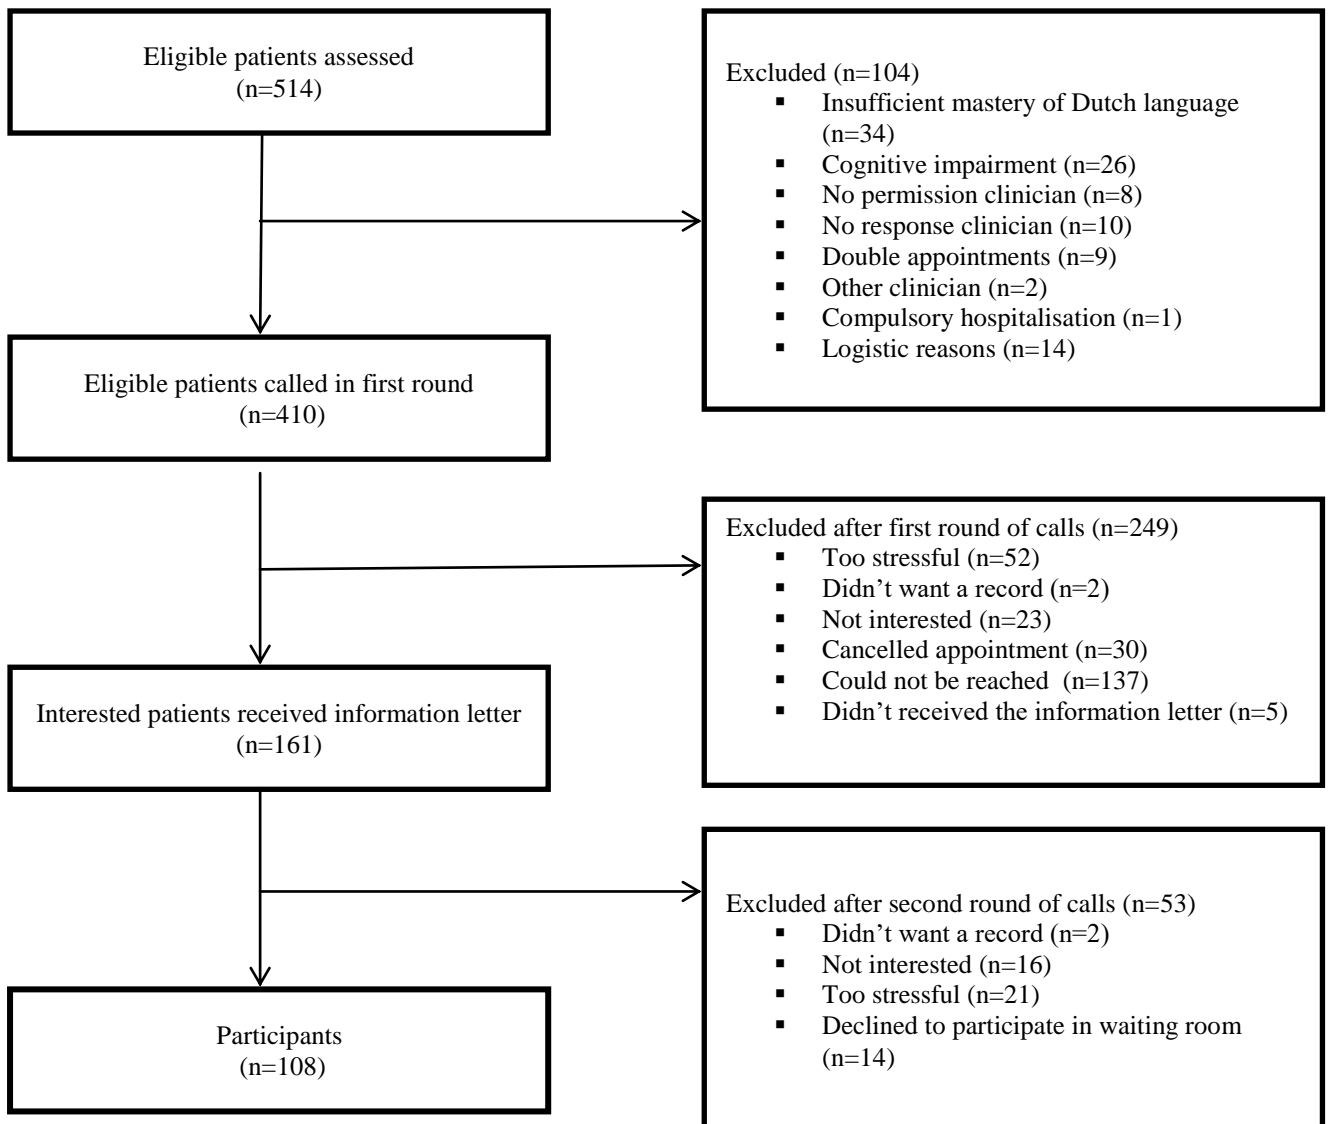

Supplement: 12911_2020_1022_MOESM1_ESM.pdf [file 12911_2020_1022_MOESM1_ESM.pdf]
