# Supplementary material for: The development of the evidence-based SDMMCC intervention to improve shared decision making in geriatric outpatients: the DICO study
Source: Springer Nature journal article supplement (doi:10.1186/s12911-020-1022-6), 2020-02-19
Supplement: 12911_2020_1022_MOESM2_ESM.pdf [file 12911_2020_1022_MOESM2_ESM.pdf]

## Supplementary S2: GRIPP2 reporting checklist

| <b>Section and topic</b>                   | <b>Item</b>                                                                                                                               | <b>Reported on page No</b> |
|--------------------------------------------|-------------------------------------------------------------------------------------------------------------------------------------------|----------------------------|
| <b>1: Aim</b>                              | Report the aim of PPI in the study                                                                                                        | 6                          |
| <b>2: Methods</b>                          | Provide a clear description of the methods used for PPI in the study                                                                      | 7,8                        |
| <b>3: Study results</b>                    | Outcomes—Report the results of PPI in the study, including both positive and negative outcomes                                            | 12 - 14                    |
| <b>4: Discussion and conclusions</b>       | Outcomes—Comment on the extent to which PPI influenced the study overall. Describe positive and negative effects                          | 15                         |
| <b>5: Reflections/critical perspective</b> | Comment critically on the study, reflecting on the things that went well and those that did not, so others can learn from this experience | 15                         |
