# Supplementary material for: The development of the evidence-based SDMMCC intervention to improve shared decision making in geriatric outpatients: the DICO study
Source: BMC Med Inform Decis Mak. 2020 Feb 19;20:35. doi: 10.1186/s12911-020-1022-6 (PMC7031985; doi:10.1186/s12911-020-1022-6)
Supplement: Supplementary file 3 — Additional file 3. Heatmap Adaptions training SDM for geriatricians. [file 12911_2020_1022_MOESM3_ESM.pdf]

## Supplementary S3 Heatmap Adaptions training SDM for geriatricians

| The Dynamic model of SDM in frail old patients                                                                                                                                                                                                                          | Recommendations from Phase I                                                                                | In SDM training general practitioners | Remove or add to SDM training geriatricians |
|-------------------------------------------------------------------------------------------------------------------------------------------------------------------------------------------------------------------------------------------------------------------------|-------------------------------------------------------------------------------------------------------------|---------------------------------------|---------------------------------------------|
| <b>1. Preparation</b>                                                                                                                                                                                                                                                   |                                                                                                             |                                       |                                             |
| 1a. History: did the patients previously discuss anything with regard to treatment or other issues?                                                                                                                                                                     | Emphasises investigating the patient's history                                                              |                                       | less attention in training                  |
| 1b. Problem analysis: functional assessment of all current problems                                                                                                                                                                                                     | Awareness of possible low health literacy or cognitive impairments & consequences for tailoring information |                                       | more attention in training                  |
| <b>2. Goal talk</b>                                                                                                                                                                                                                                                     |                                                                                                             |                                       |                                             |
| 2a. Explains to the patient that a new problem has occurred and states that choices need to be made                                                                                                                                                                     | Explicit invitation to participate in decision making                                                       |                                       | remains the same                            |
| 2b. Explains that every patient is unique and has his own preferences and priorities                                                                                                                                                                                    | Addresses goals and expectations of patient, address quality of life                                        |                                       | more attention in training                  |
| 2c. Engages the patient in a dialogue to clarify several important general topics that require clarification before choices can be made: Identifies discussion partner, addresses patient willingness to make shared decisions and identifies patient values and goals. | Discuss how informal caregiver should/wants to be involved                                                  |                                       | more attention in training                  |
|                                                                                                                                                                                                                                                                         | Focuses on building a trust-relationship between clinician and patient                                      |                                       | more attention in training                  |
| <b>3. Choice talk</b>                                                                                                                                                                                                                                                   |                                                                                                             |                                       |                                             |
| 3a. Summarizes the preceding steps and verifies if the recapitulation is correct                                                                                                                                                                                        | x                                                                                                           |                                       | more attention in training                  |
| 3b. Explains that there are several treatment possibilities and offers choice in different treatment possibilities                                                                                                                                                      | Attention for patient's preference to receive information                                                   |                                       | more attention in training                  |
| 3c. Invites the patient to formulate their treatment aims and supports the patient: there are 2 expert in the medical encounter, checks if patient has understood everything and continues to engage patient in a dialogue.                                             | Emphasize partnership geriatrician, patient, informal caregiver                                             |                                       | more attention in training                  |
| <b>4. Option talk</b>                                                                                                                                                                                                                                                   |                                                                                                             |                                       |                                             |
| 4a. Lists personalised treatment options                                                                                                                                                                                                                                |                                                                                                             |                                       | remains the same                            |
| 4b. Discusses risks, benefits and side effects of every option                                                                                                                                                                                                          |                                                                                                             |                                       | remains the same                            |
| 4c. Checks which risks and side effects the patient is willing to take                                                                                                                                                                                                  |                                                                                                             |                                       | more attention in training                  |
| 4d. Observes how the patient reacts and continues to engage the patient                                                                                                                                                                                                 |                                                                                                             |                                       | more attention in training                  |
| 4e. If possible uses decision aids                                                                                                                                                                                                                                      |                                                                                                             |                                       | more attention in training                  |
| <b>5. Decision talk</b>                                                                                                                                                                                                                                                 |                                                                                                             |                                       |                                             |
| 5a. Inquires if the patient is ready to make a decision. If not, goes back to the preceding steps                                                                                                                                                                       |                                                                                                             |                                       | much more attention in training             |
| 5b. Focuses on engaging a dialogue. Focuses on the preferences of a patient and makes a decision with the patient                                                                                                                                                       |                                                                                                             |                                       | remains the same                            |
| <b>6. Evaluation</b>                                                                                                                                                                                                                                                    |                                                                                                             |                                       |                                             |
| 6a. Discusses the decision-making process. Is everybody satisfied?                                                                                                                                                                                                      | Reflect on decision making process, make treatment plan                                                     |                                       | much more attention in training             |
|                                                                                                                                                                                                                                                                         |                                                                                                             |                                       |                                             |
| sufficiently addressed                                                                                                                                                                                                                                                  |                                                                                                             |                                       |                                             |
| moderately addressed                                                                                                                                                                                                                                                    |                                                                                                             |                                       |                                             |
| not/minimally addressed                                                                                                                                                                                                                                                 |                                                                                                             |                                       |                                             |
